# Supplementary material for: Investigation of Chlorella pyrenoidosa Protein as a Source of Novel Angiotensin I-Converting Enzyme (ACE) and Dipeptidyl Peptidase-IV (DPP-IV) Inhibitory Peptides
Source: MDPI journal article supplement (doi:10.3390/nu13051624), 2021-05-12
Supplement: s1 [file s1]

# Investigation of *Chlorella pyrenoidosa* protein as a sources of novel angiotensin I-converting enzyme (ACE) and dipeptidyl peptidase- IV (DPP-IV) inhibitory peptides

Yuchen Li<sup>1</sup>, Gilda Aiello<sup>2</sup>, Patrizia Locatelli<sup>3</sup>, Enrico Mario Alessandro Fassi<sup>1</sup>, Giovanna Boschin<sup>1</sup>, Carlotta Bollati<sup>1</sup>, Martina Bartolomei<sup>1</sup>, Gabriella Roda<sup>1</sup>, Anna Arnoldi<sup>1</sup>, Giovanni Grazioso<sup>1</sup>, Carmen Lammi<sup>1\*</sup>

<sup>1</sup> Department of Pharmaceutical Sciences, University of Milan, 20133 Milan, Italy

<sup>2</sup> Department of Human Science and Quality of Life Promotion, Telematic University San Raffaele, Rome, Italy

<sup>3</sup> Department of Pharmaceutical Sciences, University of Pavia, 27100 Pavia, Italy

\* Carmen Lammi, Department of Pharmaceutical Sciences, University of Milan, via Mangiagalli 25, 20133 Milan, Italy. Tel +39025031992, [carmen.lammi@unimi.it](mailto:carmen.lammi@unimi.it)

## Materials and Methods

### *Optimization of the protein extraction protocol from C. pyrenoidosa*

Protein extraction was optimized by varying both solvents and physical extraction methods. In detail, two solvents were used, i.e 8 M of Urea lysis buffer and 100 mM of Tris-HCl buffer. For both of them a ratio of 1:20 (biomass/solvent) was used. The extraction was conducted using the following methods: i. stirring for two hours, ii. Ultrasonication, iii. Ultrasonication + heating according to the Scheme A. The results indicated the higher efficiency in protein extraction provided by the ultrasonication plus heating method (Scheme B).

A)

| Samples | Physical Method           | Lysis Buffer | Concentration (mg/mL) |
|---------|---------------------------|--------------|-----------------------|
| C1      | Stirring for 2h           | 8 M of Urea  | 11.91                 |
| C2      | Ultrasonication           |              | 15.94                 |
| C3      | Ultrasonication + heating |              | 18.34                 |

|    |                           |              |      |
|----|---------------------------|--------------|------|
| C4 | Stirring for 2h           | 100 mM Tris- | 0.75 |
| C5 | Ultrasonication           | HCl buffer   | 3.90 |
| C6 | Ultrasonication + heating |              | 1.42 |

Scheme B)

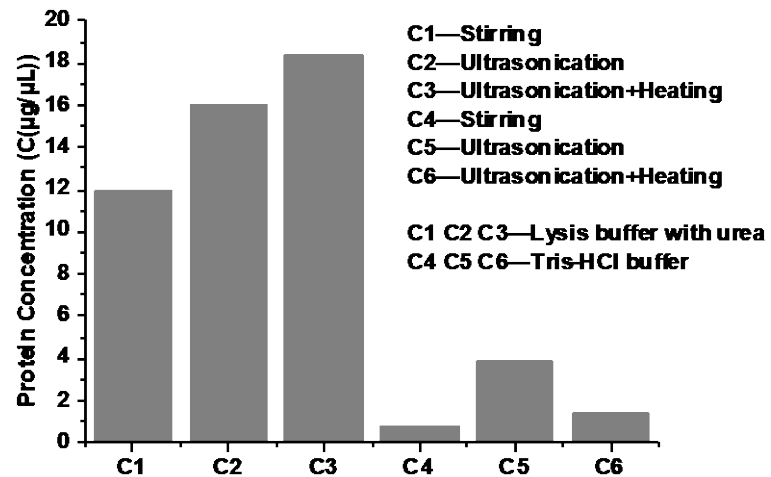

## Cell cultures

Caco-2 cells, obtained from INSERM (Paris, France), were routinely sub-cultured at 50% density and maintained at 37 °C in a 90% air/10% CO<sub>2</sub> atmosphere in DMEM containing 25 mM of glucose, 3.7 g/L of NaHCO<sub>3</sub>, 4 mM of stable L-glutamine, 1% non-essential amino acids, 100 U/L of penicillin, and 100 µg/L of streptomycin (complete medium), supplemented with 10% heat-inactivated fetal bovine serum.

### ***In vitro* measurement of the ACE inhibitory activity**

Both peptic and tryptic hydrolysates were tested for determining their ACE-inhibitory activity. For each sample, 100  $\mu\text{L}$  of 2.5 mM hippuryl-histidylleucine (HHL) in buffer 1 (100 mM Tris-HCOOH, 300 mM NaCl pH 8.3) was mixed with 30  $\mu\text{L}$  of sample in buffer 1 at different concentrations. Samples were preincubated at 37 °C for 15 min, then 15  $\mu\text{L}$  of ACE solution, corresponding to 3 mU of enzyme in buffer 2 (100 mM Tris-HCOOH, 300 mM NaCl, 10  $\mu\text{M}$   $\text{ZnCl}_2$ , pH 8.3), were added. This reaction system was incubated for 60 min at 37 °C and then stopped with 125  $\mu\text{L}$  of 0.1 M HCl. The aqueous solution was extracted twice with 600  $\mu\text{L}$  of ethyl acetate. The organic phase was collected and evaporated at 95 °C. The residue was dissolved in 500  $\mu\text{L}$  of buffer 1 and then analyzed by a HPLC 1200 series, equipped with an autosampler (Agilent Technologies, Santa Clara, US). A Lichrospher 100, C18 column (4.6 mm  $\times$  250 mm, 5  $\mu\text{m}$ ; Grace, Italy) was used with water and acetonitrile as solvent following the gradient: 0 min 5% acetonitrile, 10 min 60% acetonitrile, 12 min 60% acetonitrile, 15 min 5% acetonitrile. Injection volume was 10  $\mu\text{L}$ , wavelength 228 nm, flow 0.5 mL/min. The evaluation of ACE inhibition was based on the comparison between the concentrations of HA (hippuric acid) in the presence or absence of an estimated inhibitor. The phenomenon of autolysis of HHL to give HA was evaluated by a reaction blank, i.e., a sample with the higher evaluated inhibitor concentration and without the enzyme. The percentage of ACE inhibition was computed considering the area of HA peak with the following formula:

$$\% \text{ ACE inhibition} = \left[ \frac{(A_{\text{IB}} - A_{\text{N}})}{(A_{\text{IB}} - A_{\text{RB}})} \right] \times 100$$

where  $A_{\text{IB}}$  is the area of HA in inhibitor blank (IB) sample (i.e., sample with enzyme but without any estimated inhibitor),  $A_{\text{N}}$  is the area of HA in the  $n$  samples containing different amounts of the estimated inhibitor (in our case the hydrolysate), and  $A_{\text{RB}}$  is the area of HA in the reaction blank (RB) sample (i.e., sample without enzyme and with the estimated inhibitor at the highest concentration).

### **Cellular measurement of the ACE inhibitory activity**

ACE1 Activity Assay Kit (Biovision, Milpitas Blvd., Milpitas, CA, USA) was used to evaluate the ACE inhibitory activity. Briefly, the cells were scraped in 30  $\mu\text{L}$  of ice-cold ACE1 lysis buffer and transferred in an ice-cold microcentrifuge tube. After centrifugation at 13,300 g for 15 min at 4 °C, the supernatant was transferred into a new ice-cold tube. Total proteins were quantified by Bradford method, and 2  $\mu\text{L}$  of the supernatant (the equivalent of 2  $\mu\text{g}$  of total proteins) were added to 18  $\mu\text{L}$  of ACE1 lysis buffer in each well in a black 96-well plate with clear bottom. For the background control, 20  $\mu\text{L}$  of ACE1 lysis buffer were added to 20  $\mu\text{L}$  of ACE1 assay buffer. Then, 20  $\mu\text{L}$  of diluted ACE1 substrate [o-aminobenzoyl peptide (Abz based peptide) substrate, 4% of ACE1 substrate in assay buffer] was added in each well except the background one. The active ACE, cleaving the Abz-peptide (substrate), led to the release of the fluorophore and fluorescence signal (ex./em. 330/430 nm) was measured in a kinetic mode for 10 min at 37 °C.

### ***In vitro* measurement of the DPP-IV inhibitory activity**

The *in vitro* experiments were carried out in a half volume 96 well solid plate (white) using conditions previously optimized [1]. Each reaction system (50  $\mu\text{L}$ ) was prepared containing 1  $\times$  assay buffer [20 mM Tris-HCl, pH 8.0, containing 100 mM NaCl, and 1 mM EDTA]; CP or CT hydrolysates at the final concentration of 1.0, 2.5, and 5.0  $\text{mg mL}^{-1}$ ), sitagliptin at 1.0  $\mu\text{M}$  (positive control), or vehicle (C,  $\text{H}_2\text{O}$ ); and purified human recombinant DPP-IV enzyme. Subsequently, the mixed reagents were transferred in each well of the plate and the reaction was started by adding 50  $\mu\text{L}$  of substrate solution (5 mM H-Gly-Pro-7-amido-4-methylcoumarin (AMC)) to each well and incubated at 37 °C for 30 min. Fluorescence signals were collected using the Synergy H1 fluorescent plate reader from Biotek (ex./em. wavelengths 360/465 nm).

### **MTT assay**

A total of  $3 \times 10^4$  Caco-2 cells/well were seeded in 96-well plates and treated with 0.1 – 5.0 mg/ml of CP and CT, or vehicle (H<sub>2</sub>O) in complete growth media for 48 h at 37 °C under 5% CO<sub>2</sub> atmosphere. Subsequently, the treatment solvent was aspirated and 100 µL/well of 3-(4,5-dimethylthiazol-2-yl)-2,5-diphenyltetrazolium bromide (MTT) filtered solution added. After 2 h of incubation at 37 °C under 5% CO<sub>2</sub> atmosphere, 0.5 mg/mL solution was aspirated and 100 µL/well of the lysis buffer (8 mM HCl + 0.5% NP-40 in DMSO) added. After 10 min of slow shaking, the absorbance at 575 nm was read on the Synergy H1 fluorescence plate reader (Biotek, Bad Friedrichshall, Germany).

### **Statistical analysis**

All liquid chromatography–mass spectrometry (LC–MS) analyses were run in triplicate. For the experiments aimed at evaluating the bioactivities, all measurements were performed in triplicate and results were expressed as the mean  $\pm$  standard deviation, where p-values < 0.05 were significant. Statistical analyses were performed by t-student of Mann-Whitney and one-way ANOVA (GraphPad Prism 9, GraphPad Software, La Jolla, CA, USA) followed by Dunnett's and/or Tukey's post-hoc test.

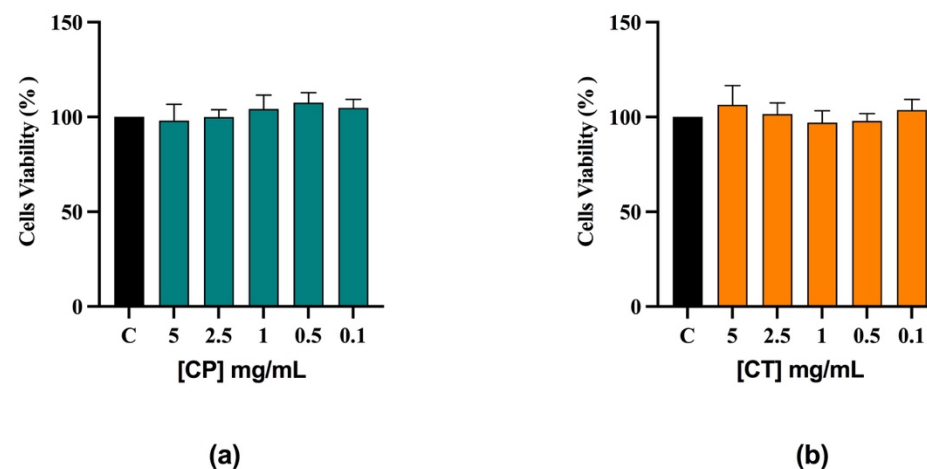

Figure S1. Effects of CP (a) and CT (b) on HepG2 cell viability assessed by MTT experiments.

## Results

**Table 1S.** LC-ESI-MS/MS based identification of tryptic (A) and peptic (B) peptides from *C. pyrenoidosa* protein hydrolysis.

(A)

| No | Protein name            | Accession no | m/z<br>(charge) | Start | Peptide sequence                   | Spectrum<br>Intensity | % AA<br>Coverage |
|----|-------------------------|--------------|-----------------|-------|------------------------------------|-----------------------|------------------|
| 1  | Leucine-tRNA ligase     | A0A087SIG7   | 540.19          | 172   | (Q)YAIQTGTHPAATTATN(I)             | 2.84E+07              | 1.2              |
| 2  | CTP synthase            | A0A1D1ZND9   | 646.42          | 386   | (K)IAAAQYARTHGVYPYFGIC(L)          | 3.93E+07              | 3                |
| 3  | Expressed protein       | E1ZPI4       | 672.68          | 88    | (M)WALGARHLVDHNATELVN(L)           | 3.14E+07              | 3.9              |
| 4  | Uncharacterized protein | E1ZHY9       | 891.37          | 709   | (L)LGALRGDEDGGGGGGGGSWRGRGRKGTE(-) | 1.20E+07              | 3.8              |
| 5  | Uncharacterized protein | E1ZF52       | 967.68          | 375   | (F)YAPCLANRPKGDEPPQASGPGLESFPDS(L) | 1.20E+07              | 5.9              |

|    |                                                        |            |        |      |                                    |          |      |
|----|--------------------------------------------------------|------------|--------|------|------------------------------------|----------|------|
| 6  | Uncharacterized protein                                | A0A087SUF8 | 473.63 | 1    | (-)MSANHDAGGS(Y)                   | 1.24E+07 | 3.8  |
| 7  | Uncharacterized protein (Fragment)                     | E1ZS03     | 563.12 | 916  | (E)LMQQLEAAAAVVGEKE(L)             | 1.08E+07 | 1.6  |
| 8  | Carboxypeptidase                                       | E1ZNB5     | 647.06 | 2350 | (C)YLNLPVQEALGVAPGLR(F)            | 2.97E+07 | 3.2  |
| 9  | Uncharacterized protein                                | M1HUP1     | 887.93 | 5    | (T)FAPRFNDGRSTAREDFHEPLPVC(L)      | 1.39E+07 | 5.9  |
| 10 | Glucose-methanol-choline<br>oxidoreductase             | A0A248QE08 | 658.71 | 264  | (T)FQVMQDKGTRADMYRQ(Y)             | 3.01E+07 | 2.4  |
| 11 | Serine/threonine-protein kinase                        | M1HU78     | 473.99 | 5    | (T)FLKPLGSGK(Y)                    | 2.75E+07 | 2.8  |
| 12 | Uncharacterized protein (Fragment)                     | A0A1D2A4B0 | 661.47 | 1148 | (D)LGGRCAGEAGALCPPRDLLN(L)         | 6.71E+07 | 1.3  |
| 13 | Uncharacterized protein                                | A0A087SFH1 | 690.05 | 12   | (T)LCRLPRGEHHPVSKPTQL(F)           | 3.14E+07 | 13.3 |
| 14 | Uncharacterized protein                                | E1ZHZ3     | 615.36 | 18   | (R)LTDRRIDGSLAAAKGTAE(L)           | 1.45E+07 | 4.4  |
| 15 | TGACG-sequence-specific DNA-<br>binding protein TGA-1B | A0A087SLT2 | 960.21 | 35   | (H)LVVLEDVRASPSASAVQFPLTHQALDD(L)  | 1.54E+07 | 5.5  |
| 16 | Uncharacterized protein                                | A0A1D1ZZN7 | 686.95 | 213  | (H)LGRLLVAGAYPVAIAWQME(Y)          | 2.19E+07 | 6    |
| 17 | Uncharacterized protein                                | A0A1D2A7Q0 | 922.44 | 81   | (F)LCVAAATVPGGWAFTHPDECTCGGISAM(L) | 7.44E+07 | 7    |
| 18 | ABC transporter A family member 2                      | A0A087SS55 | 702.68 | 680  | (H)LHVFAAIKGIPAATRAAEAAK(L)        | 1.22E+07 | 2    |
| 19 | Putative sugar phosphate/phosphate<br>translocator     | A0A087S9M6 | 837.29 | 114  | (T)YENPALPLPTPLTSLPPNPFH(L)        | 6.77E+07 | 10   |
| 20 | Cation/calcium exchanger 4                             | A0A087SNT9 | 856.45 | 263  | (L)LDPRVMHAPPLAAFEVRGRYRD(L)       | 2.31E+07 | 3.8  |
| 21 | Cytosine-specific methyltransferase                    | M1HEI8     | 989.07 | 229  | (E)WKPNGYSVNGVISTFHIKHPTRSPEN(I)   | 1.36E+07 | 7.5  |
| 22 | Uncharacterized protein                                | E1ZTT2     | 948.67 | 695  | (L)LGWSLSDGVAQTEAPQGGASHMVRFAGN(L) | 8.37E+06 | 3.5  |
| 23 | Uncharacterized protein                                | M1HE87     | 280.94 | 254  | (Q)LLTKS(I)                        | 2.72E+07 | 1.7  |
| 24 | Uncharacterized protein                                | E1ZIX6     | 785.38 | 61   | (I)LDQDVSGFAAAAAAAAAAERGPAAPQ(L)   | 2.81E+07 | 4.5  |
| 25 | Uncharacterized protein                                | E1ZIV7     | 841.11 | 45   | (F)JLSVMGVLDGTGKLIREGSGSAVFN(L)    | 1.34E+07 | 14.3 |
| 26 | Glycosyl transferase                                   | M1IGC6     | 900.21 | 84   | (Y)IDSAAVFERPITPYAEHVTDEKPI(L)     | 2.10E+07 | 2.8  |
| 27 | Broad-range acid phosphatase DET1                      | A0A087SH24 | 281.04 | 445  | (R)LLGRC(L)                        | 5.09E+08 | 0.6  |
| 28 | Uncharacterized protein                                | A0A1D2ABY3 | 864.85 | 595  | (Y)LDRGKTIVIVYCDTRESPEACAHE(I)     | 1.70E+07 | 2.1  |
| 29 | LAGLIDADG homing endonuclease                          | A0A1Z1GBL4 | 578.56 | 125  | (K)WKKHSKAIRFCTDN(F)               | 1.06E+07 | 6.8  |
| 30 | Uncharacterized protein C9orf78                        | A0A087SE57 | 541.66 | 13   | (T)LDEAHESGEEDAPPK(L)              | 1.92E+07 | 5.9  |
| 31 | Uncharacterized protein PDC1                           | E1ZFT1     | 926.51 | 113  | (R)LKMISCCNELNAGYAADGYGRANGIAC(L)  | 1.84E+07 | 4.2  |

|    |                                                                                 |            |        |     |                                    |          |      |
|----|---------------------------------------------------------------------------------|------------|--------|-----|------------------------------------|----------|------|
| 32 | Hypoxanthine<br>phosphoribosyltransferase                                       | E1ZD74     | 887.38 | 77  | (S)YGAGTVSSGKVALTMVGGTDVKGRHVL(L)  | 1.58E+07 | 14.4 |
| 33 | GIY-YIG catalytic domain-containing<br>endonuclease                             | M1HCV1     | 281.64 | 488 | (C)LLSKT(W)                        | 5.31E+08 | 1.5  |
| 34 | Type I inositol 1,4,5-trisphosphate 5-<br>phosphatase 12                        | A0A087SPV7 | 917.24 | 117 | (M)LRLIALAQSEHPFTSKNADVALSPAT(W)   | 2.48E+07 | 2.1  |
| 35 | Glucosamine--fructose-6-phosphate<br>aminotransferase                           | M1I2B0     | 961.26 | 174 | (K)YKSPLVIGMNADGSICIASDPIATTTDK(I) | 3.48E+07 | 4.7  |
| 36 | Uncharacterized protein                                                         | E1ZL33     | 591.15 | 290 | (I)WDTQPPQPTITTSGGGK(F)            | 6.82E+06 | 0.7  |
| 37 | Uncharacterized protein                                                         | E1ZLR1     | 805.23 | 7   | (S)WRPCKSDTVVERRVATAAPRD(W)        | 3.21E+07 | 2.7  |
| 38 | Uncharacterized protein                                                         | E1ZND2     | 857.67 | 462 | (L)LEVFAARMYNQRPVAVVAQM(L)         | 9.82E+06 | 2.8  |
| 39 | Uncharacterized protein (Fragment)                                              | A0A1D1ZUE1 | 941.25 | 36  | (S)WGTCARCSGPLTGALWTSGLVCVLLSGI(L) | 1.56E+07 | 7.2  |
| 40 | Uncharacterized protein                                                         | E1Z5N4     | 846.75 | 882 | (E)LWRDPNCAGSLTAAAQAAPDTPAGAL(F)   | 3.52E+07 | 1.8  |
| 41 | Palmitoyl-<br>monogalactosyldiacylglycerol delta-7<br>desaturase, chloroplastic | A0A087SFK9 | 991.24 | 499 | (W)FVNSAAHVWGSQSYRTGD(L)           | 8.78E+06 | 3    |
| 42 | Uncharacterized protein                                                         | E1ZHA1     | 843.2  | 216 | (L)LNDQSTILPSGAKEPD(Y)             | 4.68E+07 | 2.5  |
| 43 | Uncharacterized protein                                                         | E1ZK58     | 883.58 | 644 | (S)LSCFADGTPVFALADADGAFASTVFR(L)   | 1.80E+07 | 2.7  |
| 44 | Uncharacterized protein                                                         | E1ZIM1     | 867.57 | 732 | (Q)LLPLADQHLRVEATGAAQQARVLM(L)     | 1.18E+07 | 2    |
| 45 | Enhancer of polycomb-like protein                                               | E1Z3I7     | 814.44 | 1   | (-)MSRAFRARPLDVSRPLELIVD(L)        | 2.26E+07 | 2.8  |
| 46 | Uncharacterized protein                                                         | E1Z511     | 938.57 | 752 | (M)LNHGPAANAFAFDMCPLPAALPPSLQR(Y)  | 1.80E+07 | 2.8  |
| 47 | Uncharacterized protein                                                         | E1ZMI6     | 941.39 | 134 | (Y)FEKRQPFNPFLKTPYGMGAFM(L)        | 1.99E+07 | 11.7 |

(B)

| No | Protein name | Accession no | m/z<br>(charge) | Start | Peptide sequence | Spectrum<br>Intensity | % AA<br>Coverage |
|----|--------------|--------------|-----------------|-------|------------------|-----------------------|------------------|
|----|--------------|--------------|-----------------|-------|------------------|-----------------------|------------------|



|    |                                                   |            |        |      |                                      |          |      |
|----|---------------------------------------------------|------------|--------|------|--------------------------------------|----------|------|
| 1  | ATP synthase subunit beta                         | F2YGR0     | 747.35 | 256  | (K)QDVLLFIDNIFR(F)                   | 1.92E+08 | 2.4  |
| 2  | ATP synthase subunit beta                         | A0A087SBN0 | 955.5  | 259  | (R)DEEGQDVLLFVDNIFR(F)               | 1.19E+08 | 1.1  |
| 3  | Elongation factor 1-alpha                         | A0A087SK74 | 622.45 | 42   | (R)LLFELGGIPER(E)                    | 1.41E+07 | 2.3  |
| 4  | Acyl carrier protein                              | E1Z5W8     | 595.97 | 75   | (K)ISTVQEAADLIAAQIDK(-)              | 2.21E+07 | 18.6 |
| 5  | Elongation factor Tu, chloroplastic               | P56292     | 723.83 | 216  | (R)ETEKPFMAVEDVFSITGR(G)             | 1.40E+08 | 4.6  |
| 6  | Photosystem II CP47 reaction center protein       | A0A2I4S6M8 | 929.56 | 311  | (R)YQWDLGFFQQEIER(R)                 | 2.62E+07 | 2.5  |
| 7  | Uncharacterized protein                           | E1Z395     | 874.89 | 19   | (K)AAGIEVEPYWPGLFAK(L)               | 2.74E+07 | 17.3 |
| 8  | Chlorophyll a-b binding protein, chloroplastic    | E1ZLI4     | 820.73 | 59   | (K)GEFPGDYGWDTAGLSADPETFAR(Y)        | 1.63E+07 | 8.9  |
| 9  | 3-ketoacyl-CoA thiolase 2, peroxisomal            | A0A087SPH9 | 685.8  | 106  | (K)DTPVDDLIAAVLK(D)                  | 3.52E+07 | 2.8  |
| 10 | Ribulose biphosphate carboxylase large chain      | F2YGL1     | 601.28 | 218  | (R)FLFVAEAIYK(S)                     | 2.78E+07 | 2.1  |
| 11 | Expressed protein                                 | E1ZAF0     | 713.34 | 333  | (K)LDAAPEDDHITLMRNGTLR(L)            | 5.65E+07 | 2.6  |
| 12 | Uncharacterized protein                           | E1Z7I0     | 917.42 | 707  | (R)ATAAAGDVDSVLGIDRFAGYYPMYR(S)      | 4.50E+07 | 2.6  |
| 13 | Uncharacterized protein                           | E1ZJA2     | 737.01 | 31   | (R)GITFGRAGFTTGTGDGLVVVQR(Y)         | 7.15E+07 | 7.8  |
| 14 | DNA excision repair protein ERCC-6-like protein   | A0A087SA08 | 916.63 | 311  | (R)LLAGGYSFEIQEHLAHASFIPGFSR(A)      | 4.54E+07 | 1.6  |
| 15 | WD repeat-containing protein 74                   | A0A087SLF6 | 697.1  | 131  | (R)QPDDGAWAEAWRWQAACK(E)             | 5.92E+07 | 5.6  |
| 16 | Uncharacterized protein                           | E1ZA50     | 916.79 | 71   | (K)SGGCHSDHSTPGSSGSAAAHGAAHGPPPPR(Q) | 5.55E+07 | 4.3  |
| 17 | Expressed protein                                 | E1Z3R5     | 903.94 | 229  | (R)QELRCQGSCHSDTIDCMRFLPGGR(L)       | 1.85E+07 | 5.8  |
| 18 | Putative histone-lysine N-methyltransferase ATXR3 | A0A087SSG3 | 686.73 | 342  | (R)DAWGMDCYTRR(N)                    | 3.82E+07 | 0.8  |
| 19 | Uncharacterized protein                           | E1Z1Z7     | 891.36 | 134  | (R)DYFLPIVADAEAGFGGPLNAYELTK(H)      | 6.00E+07 | 5.9  |
| 20 | Putative polygalacturonase                        | A0A087SUF0 | 700.16 | 139  | (R)ALVDWADPSCPVPSECRPR(L)            | 3.77E+07 | 4.3  |
| 21 | Uncharacterized protein                           | E1Z9B3     | 700.16 | 12   | (R)GEEDLLKIQQLDEALDR(R)              | 3.85E+07 | 5.2  |
| 22 | Uncharacterized protein (Fragment)                | E1ZMP5     | 809.48 | 272  | (K)GLLNLIIDLASERLSRSAVTGER(L)        | 7.36E+06 | 6    |
| 23 | DNA polymerase epsilon catalytic subunit A        | A0A087SA98 | 745.04 | 1923 | (R)LLQTHGEKLEVSAEELNAPR(F)           | 2.76E+07 | 0.9  |

|    |                                                                    |            |        |      |                                   |          |      |
|----|--------------------------------------------------------------------|------------|--------|------|-----------------------------------|----------|------|
| 24 | Uncharacterized protein                                            | E1ZBW6     | 773.42 | 633  | (R)GPFKGGGGGGGGSGARGSGVEAAGQER(D) | 9.52E+06 | 4    |
| 25 | Thymidylate synthase                                               | M1IKB3     | 801.03 | 162  | (K)ESARMVLPMSPTTIYMTGTAR(S)       | 9.81E+06 | 9.7  |
| 26 | Uncharacterized protein                                            | E1ZQZ4     | 617.97 | 22   | (R)LEQAQSEHSQLEAVR(S)             | 3.87E+07 | 4.6  |
| 27 | Biotin carboxyl carrier protein of acetyl-CoA carboxylase          | A0A087SAZ6 | 698.86 | 189  | (R)VGKGPLAAAGDSVKK(G)             | 6.59E+07 | 6.3  |
| 28 | Uncharacterized protein                                            | A0A1D1ZW70 | 840.83 | 383  | (R)LYRVDIQLAFPEASTKALTAGVR(Q)     | 1.24E+07 | 3    |
| 29 | Uncharacterized protein (Fragment)                                 | A0A1D1ZQ66 | 855.86 | 160  | (R)LGGHGGARARHHAHHAGGDADALPR(G)   | 4.04E+07 | 6.3  |
| 30 | PBCV-specific basic adaptor domain-containing protein              | M1HTF0     | 972.53 | 205  | (K)INIQGTNTGAFKKVYSNFIFPIQTSK(G)  | 1.28E+07 | 5.2  |
| 31 | Uncharacterized protein Z225R                                      | A7K8I5     | 637.27 | 146  | (K)DTIQRFAREQLNDFR(Y)             | 3.86E+07 | 4.3  |
| 32 | Uncharacterized protein                                            | E1ZTL8     | 654.31 | 59   | (R)IVAGYQLNLATEEVERR(L)           | 9.71E+06 | 7.7  |
| 33 | Pre-mRNA-splicing factor SYF1                                      | A0A087SH90 | 926.15 | 394  | (K)QILCYTEAVRTVDPDK(A)            | 1.18E+08 | 1.7  |
| 34 | Uncharacterized protein b105L                                      | A7IVY0     | 942.22 | 75   | (R)QASRLIGIAREAILFSIDNLSSHGTR(N)  | 2.64E+07 | 11.3 |
| 35 | Prostaglandin E synthase 2                                         | A0A087SK04 | 923.61 | 131  | (K)TPLPLPESIVLYQYEVCPFCCKVK(A)    | 6.66E+07 | 8.4  |
| 36 | Uncharacterized protein                                            | E1ZP51     | 281.11 | 175  | (R)LLSTK(A)                       | 5.17E+08 | 2.1  |
| 37 | Uncharacterized protein                                            | E1Z860     | 713.91 | 208  | (R)VMPLREGGADIPVTEENRR(E)         | 6.35E+07 | 4.8  |
| 38 | Uncharacterized protein                                            | M1HZD6     | 775.8  | 236  | (K)ILAETDDVSADVAPAIQIILEK(T)      | 4.98E+06 | 7.3  |
| 39 | Uncharacterized protein                                            | E1ZDE7     | 922.88 | 207  | (K)IEALRAIMERPVAANGATLHFVDDR(Y)   | 4.00E+07 | 8    |
| 40 | Uncharacterized protein M629L                                      | A7IV09     | 831.93 | 199  | (R)EHNTAGGFLDHLVSSIAGEVERR(L)     | 6.09E+06 | 9.9  |
| 41 | Elongation factor G, mitochondrial                                 | E1Z1Z5     | 781.03 | 362  | (R)VLLPCSKTGPLVALAFKLEEGR(F)      | 4.88E+07 | 2.8  |
| 42 | Uncharacterized protein                                            | M1HK68     | 812.2  | 190  | (K)RAFSLVRPFDNSLVTTTEIVDR(N)      | 3.57E+07 | 8    |
| 43 | Putative serine/threonine-protein kinase GCN2                      | A0A087SFY1 | 576.18 | 105  | (R)DVAHEMALKKREAEAR(R)            | 1.67E+07 | 1.1  |
| 44 | Uncharacterized protein (Fragment)                                 | A0A1D1ZYR9 | 280.96 | 1    | (-)QIYTMGK(D)                     | 7.32E+08 | 1.2  |
| 45 | Uncharacterized protein                                            | E1Z459     | 792.23 | 1755 | (R)QAADGPAGGGGVVVDLVGGGAAPVRVK(R) | 1.10E+08 | 1.4  |
| 46 | Abnormal spindle-like microcephaly-associated protein-like protein | A0A087SMF7 | 836.46 | 252  | (R)LVDALTGRPGLALQTEIDRLAAGR(G)    | 1.90E+07 | 2    |
| 47 | Protein arginine N-methyltransferase                               | A0A087SR29 | 967.19 | 371  | (R)MYAVEKNPNAIVTLSHRVETEWQGK(V)   | 2.11E+07 | 4    |
| 48 | Uncharacterized protein                                            | E1Z6X6     | 630.59 | 250  | (R)NREALYAVSGALERAAAK(R)          | 1.35E+07 | 3.4  |

|    |                                                                          |            |        |     |                                   |          |      |
|----|--------------------------------------------------------------------------|------------|--------|-----|-----------------------------------|----------|------|
| 49 | Uncharacterized protein                                                  | A0A1D2A538 | 838.43 | 1   | (-)MALGPTVIRGNASEIMALASLGGER(T)   | 5.89E+07 | 11.7 |
| 50 | Uncharacterized protein                                                  | A0A1D2ACR1 | 990.94 | 32  | (R)SITVPRPISAPTYAPEDPKGRSFVQTR(Y) | 6.68E+06 | 6.6  |
| 51 | Gene, similar to reverse transcriptase genes of various retrotransposons | O64463     | 713.62 | 56  | (R)LIDAAAEFCEQTGMVISVDK(T)        | 8.21E+07 | 10.4 |
| 52 | Transmembrane protein 56-A                                               | A0A087SMF8 | 923.57 | 260 | (R)TLKPEELDSSIGAAFGAPRHDVSKDK(D)  | 6.83E+06 | 13.4 |
| 53 | Uncharacterized protein                                                  | E1ZE84     | 926.51 | 712 | (K)IPVSPEEHQPALPPATLRPETAAEAR(A)  | 3.59E+07 | 2.8  |
| 54 | Uncharacterized protein                                                  | E1ZJF1     | 906.17 | 201 | (K)LRAEVAAAEGAWLPPWAAASLGPALAR(T) | 2.14E+07 | 6.3  |
| 55 | Uncharacterized protein                                                  | E1ZCL5     | 474.11 | 472 | (R)EAERGGDGR(G)                   | 2.00E+07 | 1.6  |
| 56 | Uncharacterized protein                                                  | A0A1D2AD70 | 684.99 | 327 | (R)KLIIGSLPVSLFCSGQTYK(E)         | 1.43E+07 | 2.9  |
| 57 | Uncharacterized protein                                                  | E1ZFA8     | 280.96 | 267 | (R)ILGCR(F)                       | 2.01E+09 | 0.4  |
| 58 | Chaperone protein dnaJ 10                                                | A0A087SRC2 | 988.59 | 197 | (R)FQRLGQAYQVLGNPDLR(A)           | 1.49E+07 | 4    |
| 59 | Uncharacterized protein                                                  | A0A1D2A1J8 | 941.35 | 229 | (R)LLQTAPQLLPAAVEAFYYRDLDDAK(A)   | 1.40E+07 | 4    |
| 60 | Hydrogenase                                                              | E7BYE2     | 617.29 | 200 | (K)QGEADREWFNTTGLAR(D)            | 2.72E+07 | 3.6  |
| 61 | Protein DGCR14                                                           | A0A087SQK6 | 871.89 | 178 | (K)SAAGPRPTDGFGTGGQPSDRLVQWR(Y)   | 3.81E+07 | 7.2  |
| 62 | Uncharacterized protein                                                  | E1ZPJ5     | 663.54 | 110 | (K)QQEGERLRAEGDGGGDGK(G)          | 1.22E+07 | 5.2  |
| 63 | Peptidyl-prolyl cis-trans isomerase, chloroplastic                       | A0A087SB74 | 955.91 | 46  | (R)YALPIHNTPIRQVQESLESISEALR(I)   | 7.00E+07 | 2.5  |
| 64 | Uncharacterized protein                                                  | E1Z9J7     | 886.15 | 39  | (K)IVVVGQSSGKSSVLEAVVGRDFLPR(G)   | 1.98E+07 | 4.2  |
| 65 | Phosphatidylserine synthase 2                                            | A0A087SSA8 | 280.93 | 420 | (R)QHAGTKAK(A)                    | 2.68E+07 | 1.8  |
| 66 | Uncharacterized protein                                                  | A0A1D1ZZN9 | 706.3  | 889 | (R)QWGGAAQREASASPAAESTSR(A)       | 8.03E+07 | 1.9  |



## Validation and assessment of the docking protocol.

As reported in the main text, before starting docking calculations on the short peptides, the accuracy of the GLIDE docking protocol, and the parameters to apply, was established by docking the ligands co-crystallized within ACE and DPP-IV, i.e., captopril and IPI. The RMSD between the docking pose endowed with the highest score and the one found in the X-ray was calculated. Typically, RMSD values within 2 Å are considered successful, whereas values higher than 3 Å indicate docking failure [2]. For each complex (captopril-ACE and IPI-DPP-IV). **Figure S1** shows the comparison between the docking poses and crystal structures. As displayed, the docking results of captopril/ACE presents an excellent RMSD value of 0.7640 Å. The binding sites were profiled clearly in 2D interaction view (**Figures S1B** and **S1C**). In both pictures, the residues GLN281 and TYR520 were bound to the carboxyl group of captopril by hydrogen bonds, while LYS511 creates a salt bridge; His353 and His513 interact with the carbonyl group bound to the pyrrolidine ring by a hydrogen bond. Interestingly, in the docking pose, a salt bridge was generated between the zinc ion and the thiol group of captopril, as was found in the crystal structure, greatly contributing to the inhibition of enzyme activity [3,4]. Although the metal coordination was not fully predicted by docking calculations with GLIDE, the distance between the zinc ion and captopril was really close to the one found in the crystal structure (2.34 vs 2.37 Å).

In the case of IPI/DPP-IV complex (**Figure S1D**), the docking structure got a slightly higher RMSD of 2.7390 Å versus the crystal structure despite all the residues involved in the interaction with IPI in the X-ray complex were also involved in the docking pose of IPI. Only the conformation of the hydrophobic chains was docked differently (see **Figure S1E-F**). However, the overall orientation of IPI is largely reproduced by the docking protocol, in fact the H-bond network and the salt bridges

shaped by Glu205, Glu206 and Arg125 were found in the IPI docked pose endowed with the best glide score.

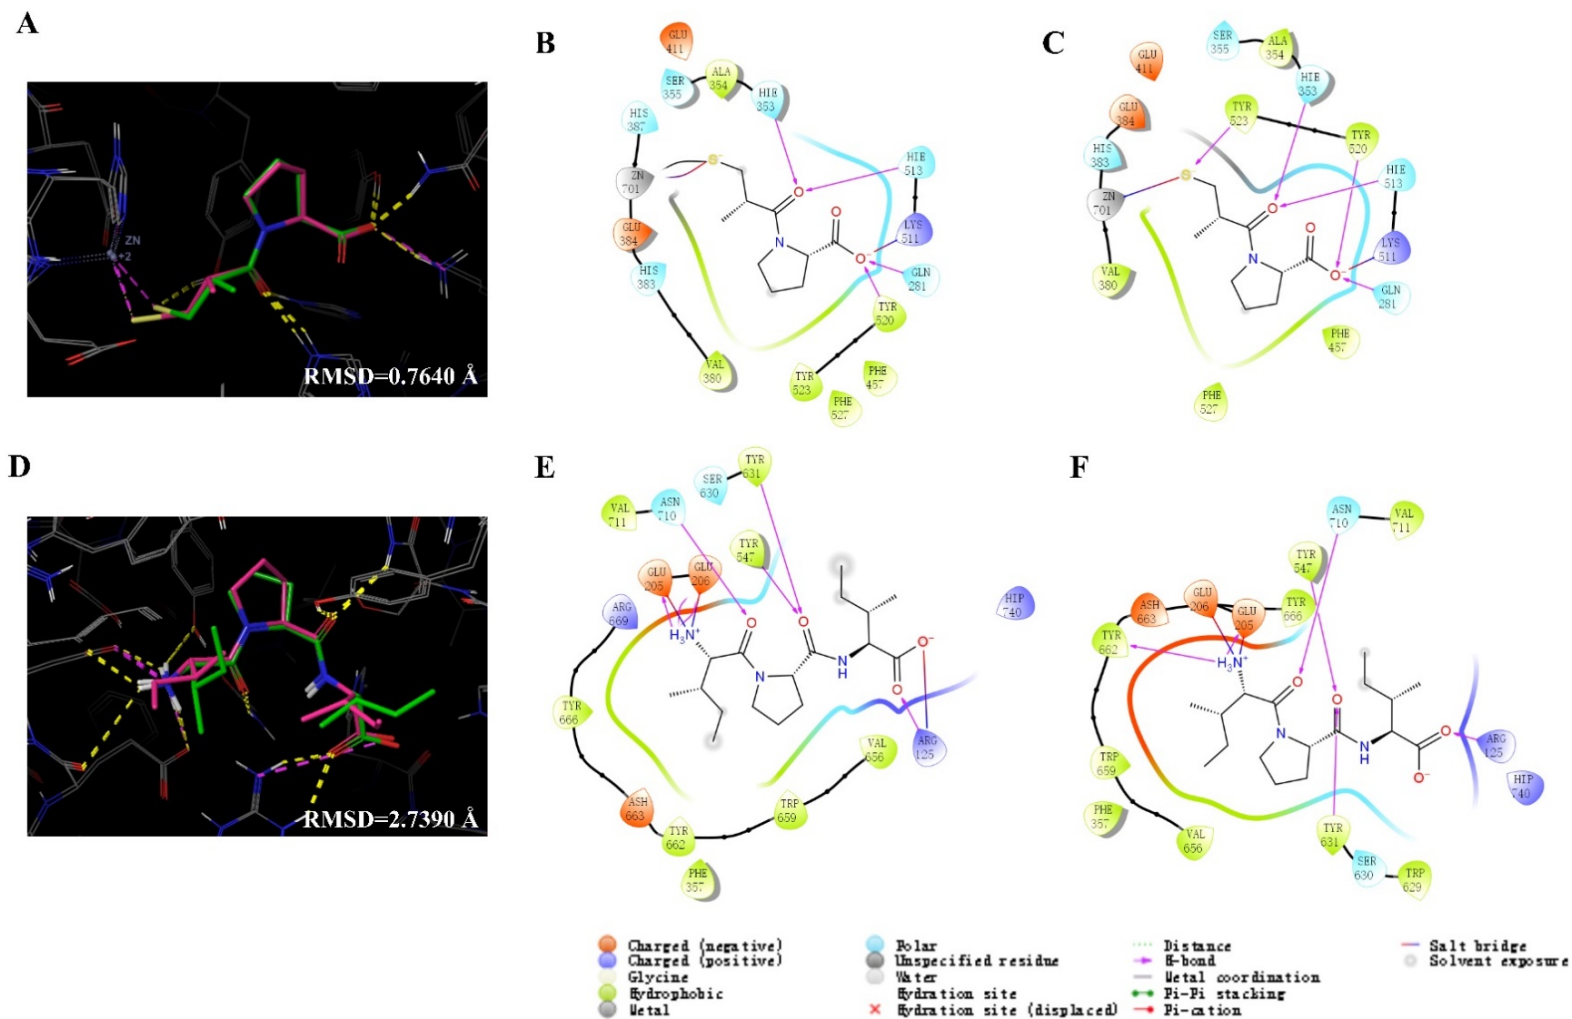

**Figure S2.** Validation of the docking protocol by comparing the docking pose and the crystal structures of ACE/captopril and DPP-IV/IPI complexes. For ACE: (A) the alignment of docking pose (green) and crystal structure of captopril (pink); (B) binding mode of captopril as was found in the X-ray crystal structure; (C) predicted binding mode of captopril as was found in the best docking pose. For DPP-IV: (E) alignment of docking pose (green) and the X-ray crystal structure of IPI (pink); (F) binding mode of IPI within DPP-IV as in the X-ray crystal structure; (G) predicted binding mode of IPI as it was predicted by docking calculations. In (A) and (D) figures, hydrogen bond is present as yellow line and salt bridge is purple line.

**A**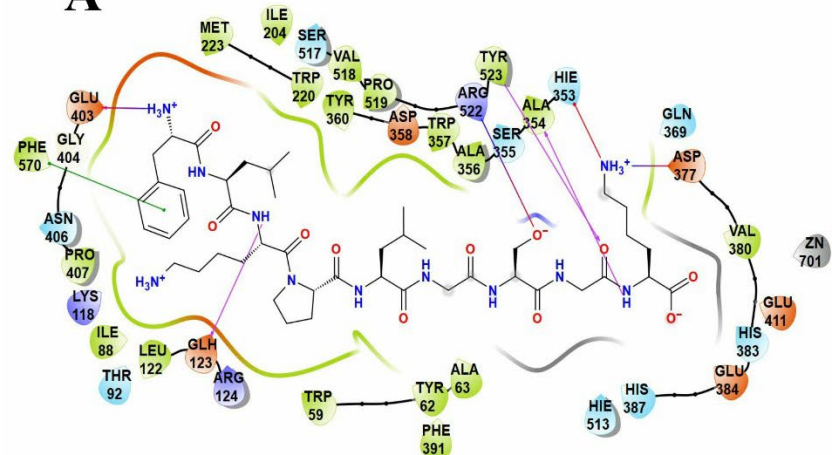**B**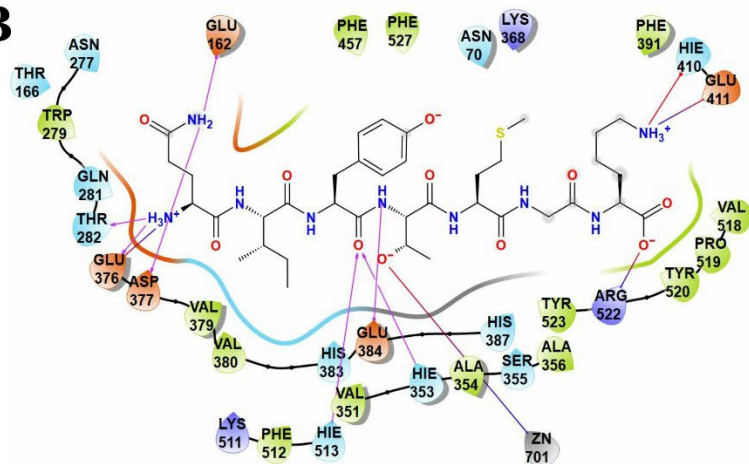**C**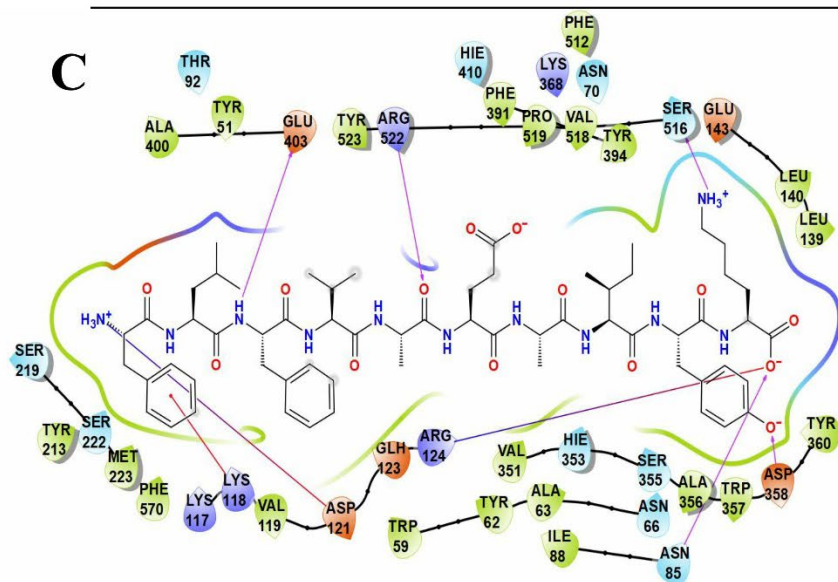**D**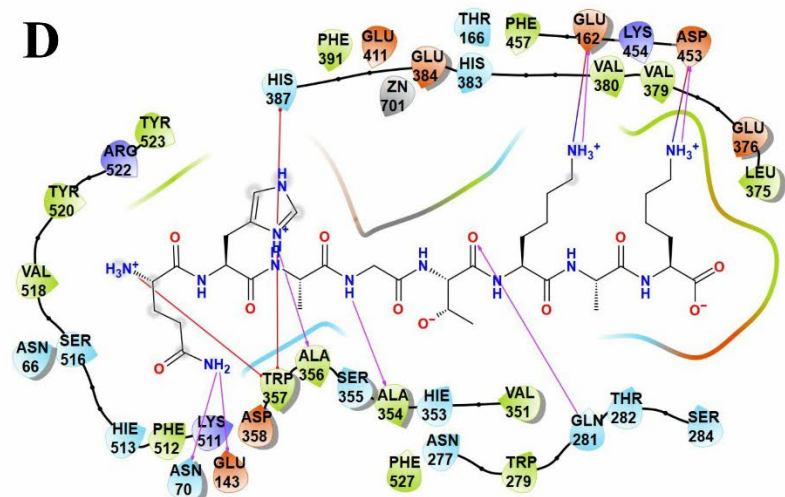



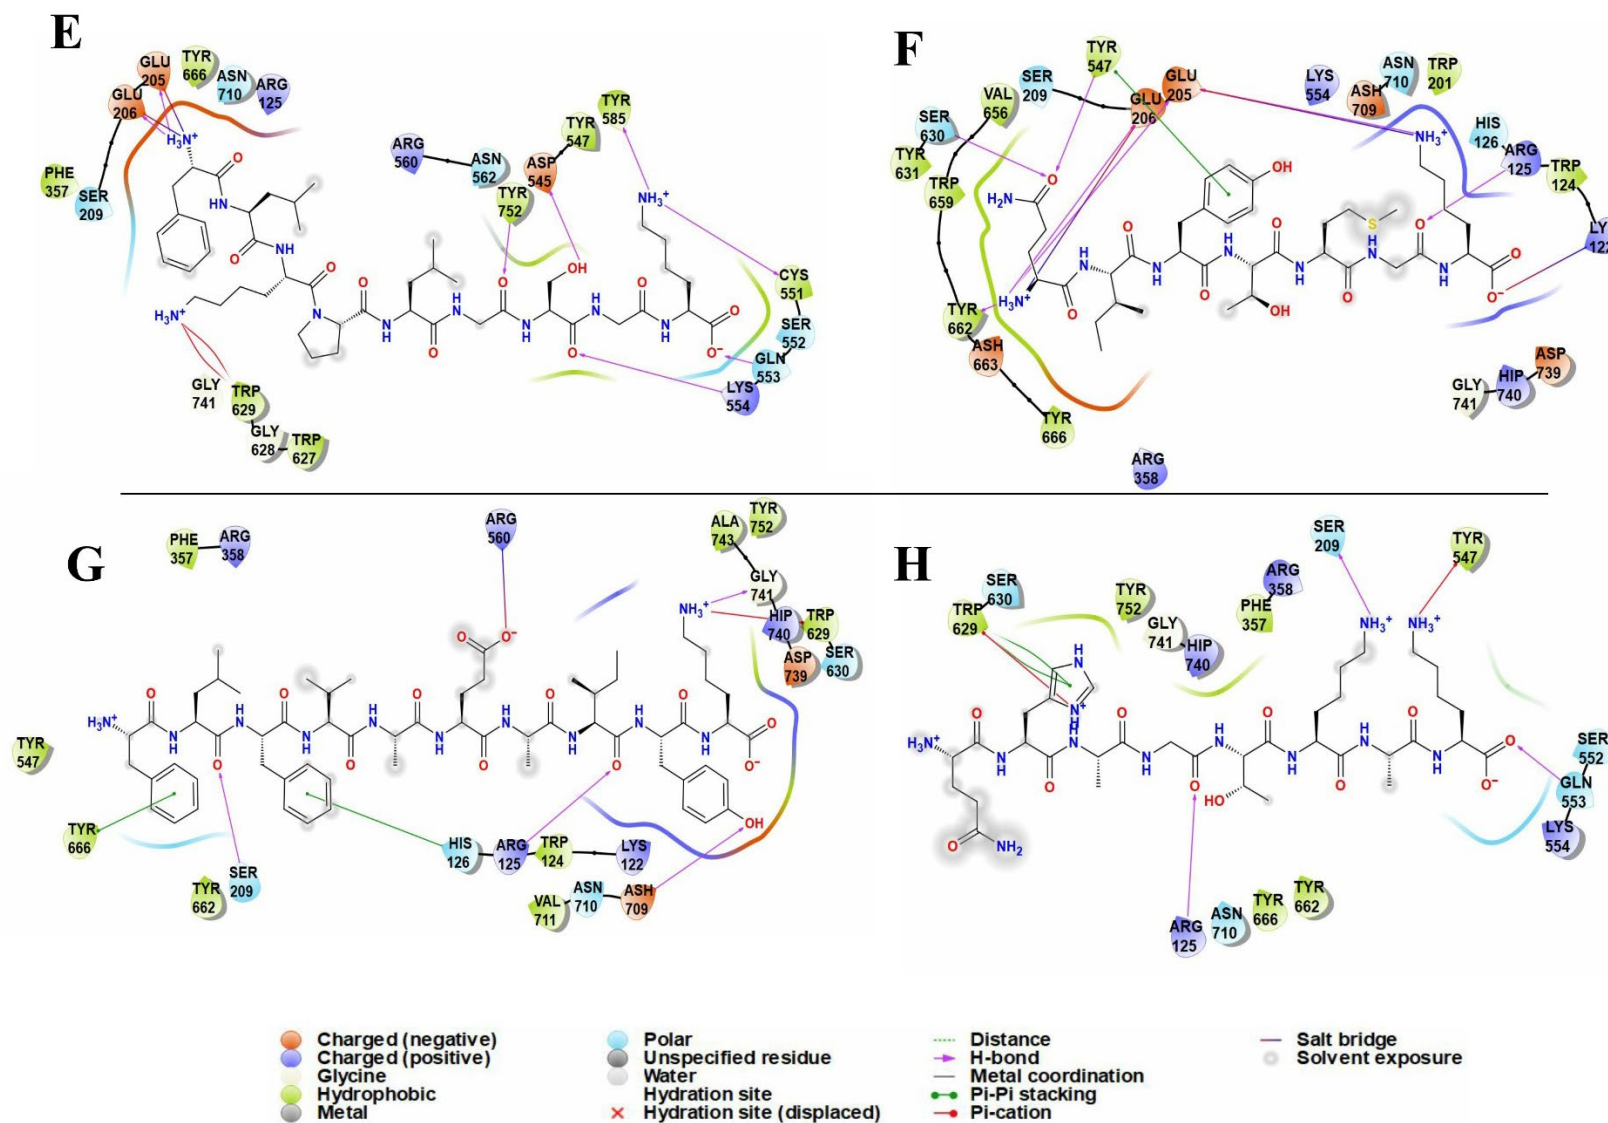

**Figure S3.** 2D views of the predicted binding modes between *C. pyrenoidsa* derived peptides and ACE/DPP-IV. (A) Pep2 (FLKPLGSGK), (B) Pep7 (QIYTMGK), (C) Pep8 (FLFVAEAIYK), and (D) Pep10 (QHAGTKAK) in complex with ACE; (E)Pep2 (FLKPLGSGK), (F) Pep7 (QIYTMGK), (G) Pep8 (FLFVAEAIYK), and (H) Pep10 (QHAGTKAK) in complex with DPP-IV.

**Peptide stability evaluation of screened peptides by *in vitro* digestion.** CP and CT solution (pH 2.0) were treated by pepsin (4 mg/mL in NaCl) respectively (E/S ratio 1:100) at 37 °C for 60 min with continuous shaking. Then the pH was adjusted to 8.0 with 1 M NaOH and pancreatin (4 mg/mL in ddH<sub>2</sub>O) was added (E/S ratio 1:100) to mimic the intestinal digestion at 37 °C for 15 min. The enzymatic reaction was blocked by heating at 95 °C for 10 min and the employed enzymes were totally removed by centrifugal ultrafiltration (3 kDa cutoff). Above process was repeated except the addition of pepsin and pancreatin, serving as controls. The stability of four screened peptides was assessed through multiple reaction monitoring (MRM) mass spectrometry. The injected samples were eluted as following gradients: 5% solvent B (0 min), 70% solvent B (0-10 min), and back to 5% in 5 min. The drying gas temperature was set at 300 °C, flow rate 3 L/min (nitrogen). Data acquisition was carried out in positive ionization mode. Capillary voltage was -2000 V, with endplate offset -500 V. Full scan mass spectra were acquired in the mass range from 100 to 850 Da. Capillary voltage was -2000 V, with endplate offset -500 V, skimmer -40 V, drying gas flow 5 L/min, drying gas temperature 300 °C. The targeted assay was performed by targeting the precursor ions at  $m/z$  474.0 for Pep2 (FLKPLGSGK),  $m/z$  601.3 for Pep8 (FLFVAEAIYK) and  $m/z$  281 for both Pep7 (QIYTMGK) and Pep10(QHAGTKAK), respectively. Peptides were targeted through matching the retention time, MS profiles and MS/MS fragmentation spectra. For Pep2 and Pep8, intensity of their MS profiles was acquired to monitor the peptide stability, instead, for Pep7 and Pep10, since their  $m/z$  are quite similar, the intensity of typical fragment ions at  $m/z$  167.9, 319.0 for Pep7 and  $m/z$  197.4, 394.1 for Pep10 were employed

**A**

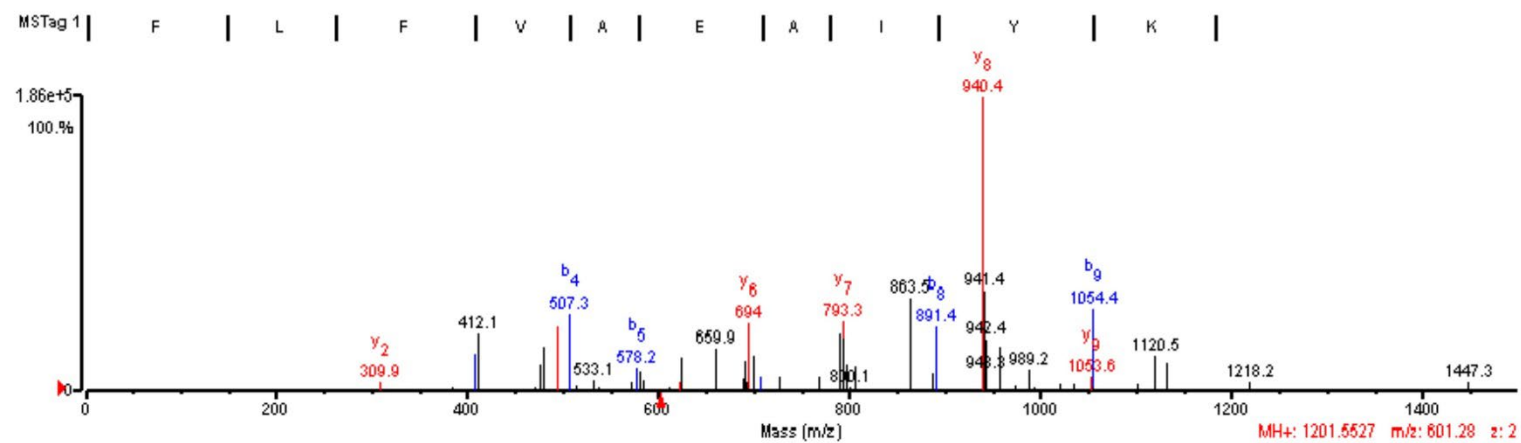

**B**

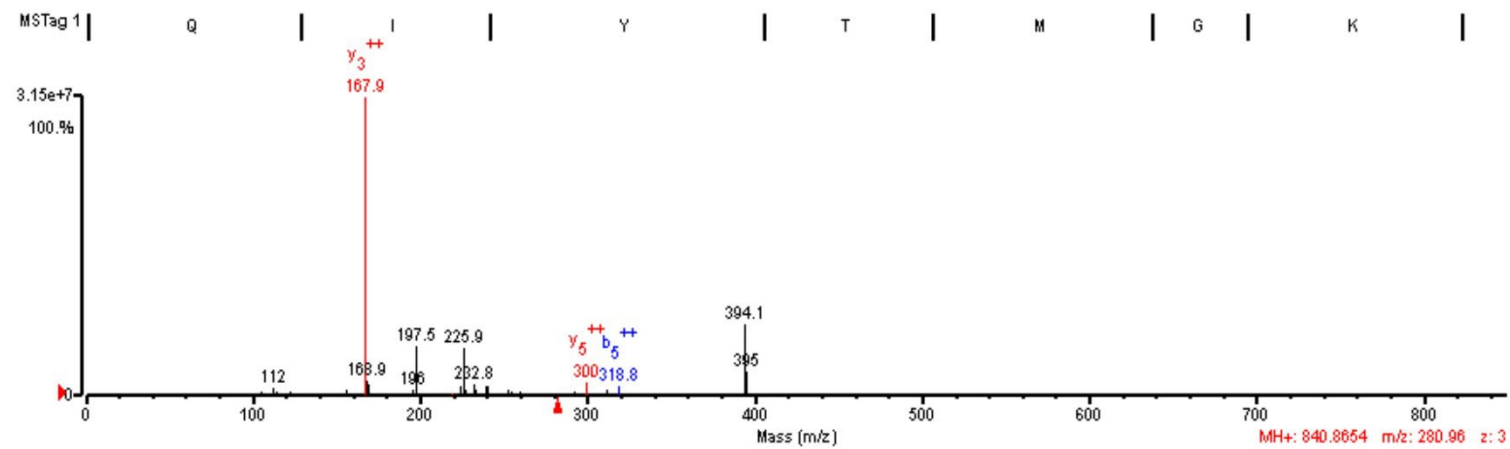

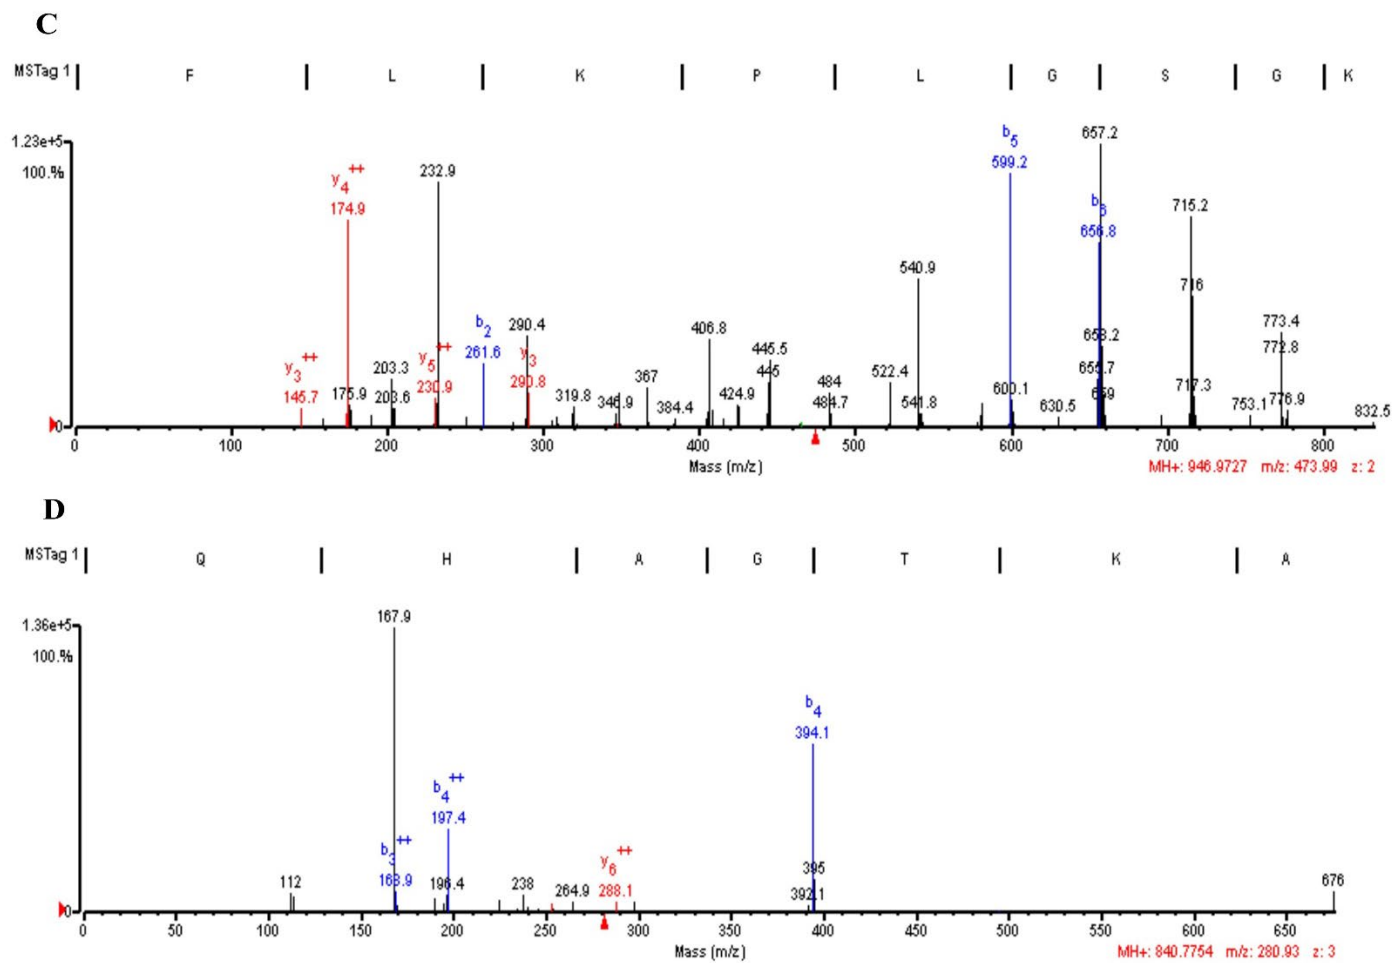

**Figure S3.** Electrospray ionization-tandem mass spectrometry spectra of  $[M+H]^+$  ions of (A) Pep2, (B) Pep 7, (C) Pep8 and (D) Pep10, respectively.

## References

1. Lammi, C.; Zanoni, C.; Arnoldi, A.; Vistoli, G., Peptides derived from soy and lupin protein as Dipeptidyl-Peptidase IV inhibitors: *In vitro* biochemical screening and *in silico* molecular modeling study. *J Agric Food Chem* **2016**, *64*, 9601-9606.
2. Ding, Y.; Fang, Y.; Moreno, J.; Ramanujam, J.; Jarrell, M.; Brylinski, M., Assessing the similarity of ligand binding conformations with the Contact Mode Score. *Computational Biology and Chemistry* **2016**, *64*, 403-413.
3. Natesh, R.; Schwager, S. L. U.; Evans, H. R.; Sturrock, E. D.; Acharya, K. R., Structural details on the binding of antihypertensive drugs captopril and enalaprilat to human testicular angiotensin I-converting enzyme. *Biochemistry* **2004**, *43*, 8718-8724.
4. Bunning, P.; Riordan, J. F., The functional-role of zinc in angiotensin converting enzyme - implications for the enzyme mechanism. *Journal of Inorganic Biochemistry* **1985**, *24*, 183-198.
